# Supplementary material
Source: publisher figshare collection journal article supplement (https://karger.figshare.com/ndownloader/files/14810501)
Supplement: Supplementary file 1 [file 14810501]

Supplementary Table S1. Impact of progressed calcified scores in aortic arch on hospitalization frequency and length.

|                                           | HFHD (N=108)        |                 | HDF (N=102)         |                 | <i>P</i> <sup>a</sup> | (A vs. B) (C vs. D) (A vs. C) (B vs. D) |                       |                       |                       |
|-------------------------------------------|---------------------|-----------------|---------------------|-----------------|-----------------------|-----------------------------------------|-----------------------|-----------------------|-----------------------|
|                                           | Non-progressors (A) | progressors (B) | Non-progressors (C) | progressors (D) |                       | <i>P</i> <sup>b</sup>                   | <i>P</i> <sup>b</sup> | <i>P</i> <sup>b</sup> | <i>P</i> <sup>b</sup> |
| Cases, %                                  | 25 (23.15%)         | 83 (76.85%)     | 33 (32.35%)         | 69 (67.65%)     | 0.136                 |                                         |                       |                       |                       |
| Hospitalization frequency (mean ± SD)     | 3.18 ± 2.54         | 3.34 ± 2.74     | 2.83 ± 2.39         | 2.88 ± 2.17     |                       | 0.976                                   | 0.675                 | 0.211                 | 0.125                 |
| Hospitalization frequency (median, range) | 2 ( 1-4)            | 2 ( 2-4)        | 2 ( 1-4)            | 2 ( 1-4)        |                       |                                         |                       |                       |                       |
| Hospitalization length (mean ± SD)        | 30.59 ± 34.69       | 40.21 ± 43.8    | 38.65 ± 48.51       | 37.79 ± 55.31   |                       | 0.456                                   | 0.882                 | 0.999                 | 0.474                 |
| Hospitalization length (median, range)    | 25 ( 13-30)         | 24 ( 13-46)     | 18 ( 7-60)          | 20 ( 7.5-49)    |                       |                                         |                       |                       |                       |

<sup>a</sup> *P* is estimated using chi-squared test.

<sup>a</sup> *P* is estimated using independent two-sample t-test.

Patients obtained higher calcified scores in secondary measure compare to initial measurement were defined as VC progressors, others were defined as non-progressors
